# Supplementary material
Source: PubMed Central journal article supplement (PMC4107207)

Willebrand factor staining. Black arrowheads denote endothelium staining, blue arrowheads denote decidual stromal cell staining and green arrowheads denote cytotrophoblast cell staining. Images were taken under 200X magnification. Scale bar denotes 100µm.

#### **Supplementary Figure 1**

##### **mRNA expression of maternal susceptibility genes: Subset VS residual samples**

Relative mRNA expression of maternal pre-eclampsia susceptibility genes in human third trimester *decidua basalis* samples from subset n=7 severe pre-eclamptic pregnancies and residual n=17 severe pre-eclamptic pregnancies. Data presented as mean + SEM. \* p<0.05, \*\* p<0.01, \*\*\* p<0.001, Mann Whitney *U* test.

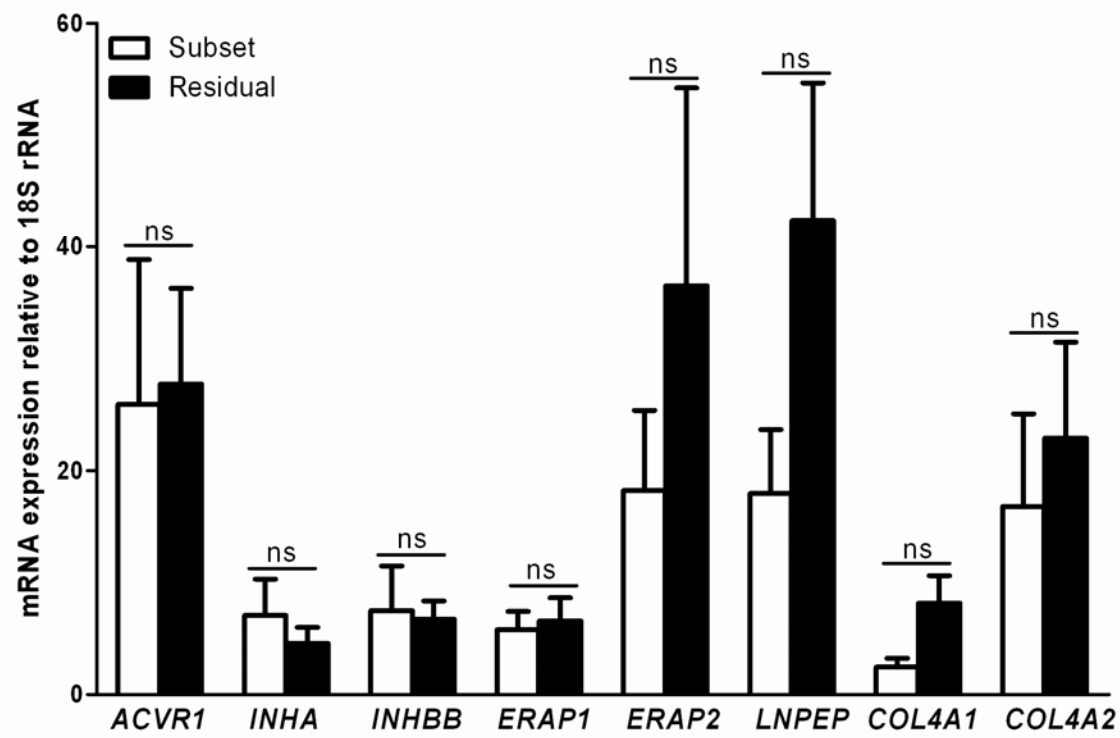

Supplement: NIHMS600445-supplement-04.pdf [file NIHMS600445-supplement-04.pdf]
